# Supplementary material for: Artificial Intelligence impact on decision-making regarding short-term ADT with prostate radiotherapy: ASTuTE clinical trial interim results
Source: Research Square preprint supplement (doi:10.21203/rs.3.rs-7210927/v1), 2025-08-22

**SUPPLEMENTARY**

**Supplementary Table 1**: **Demographics**

| **Parameter** | **FIR n=50** | **UIR n=150** |
| --- | --- | --- |
| Median age, yr (IQR) | 71 (68 - 75) | 74 (71 – 77) |
| T stage *n* (%) |  |  |
| T1c | 29 (58) | 38 (25) |
| T2a | 21 (42) | 38 (25) |
| T2b |  | 30 (20) |
| T2c |  | 44 (30) |
| PSA *n* (%) |  |  |
| PSA ≥ 10 | 2 (4) | 53 (35) |
| PSA < 10 | 48 (96) | 97 (65) |
| Total core involvement *n* (%) |  |  |
| <50% | 50 (100) | 100 (66) |
| ≥50 % |  | 50 (33) |
| ISUP *n* (%) |  |  |
| ISUP 1 | 2 (4) |  |
| ISUP 2 | 48 (96) | 62 (41) |
| ISUP 3 |  | 88 (59) |
| Median 10-year PCSM risk (IQR) | 0.8 (0.6 – 0.9) | 1.2 (0.9 – 1.6) |
| Median 10-year DM risk (IQR) | 1.7 (1.4 – 2.0) | 2.6 (2.0 – 3.4) |
| Predictive Biomarker *n* (%) |  |  |
| Positive | 7 (14) | 23 (15) |
| Negative | 43 (86) | 127 (85) |

FIR = favourable intermediate-risk; UIR = unfavourable intermediate-risk; IQR = interquartile range; PSA = prostate-specific antigen; ISUP = International Society of Urological Pathology; PCSM = prostate cancer specific mortality; DM = distant metastases

**Supplementary Fig. 1 – MMAI Test report examples in four common clinical scenarios. Green box highlighting the 10-year risk of distant metastasis, reported as a continuous variable with low, intermediate, and high-risk categories. Blue box highlighting the 5-year risk of distant metastases and 10-year risk of prostate cancer-specific mortality to help inform decision-making, separate prognostic models are used to calculate these risks. Purple box highlighting the predictive biomarker test result for ADT benefit.**

**A) Scenario A – initial PSA 9.72, ISUP 3, T1c. Predictive for a Low 2% 10-year risk of distant metastasis with short-term ADT to be of ‘less benefit’. Anticipated very low absolute benefit with the addition of ADT.**


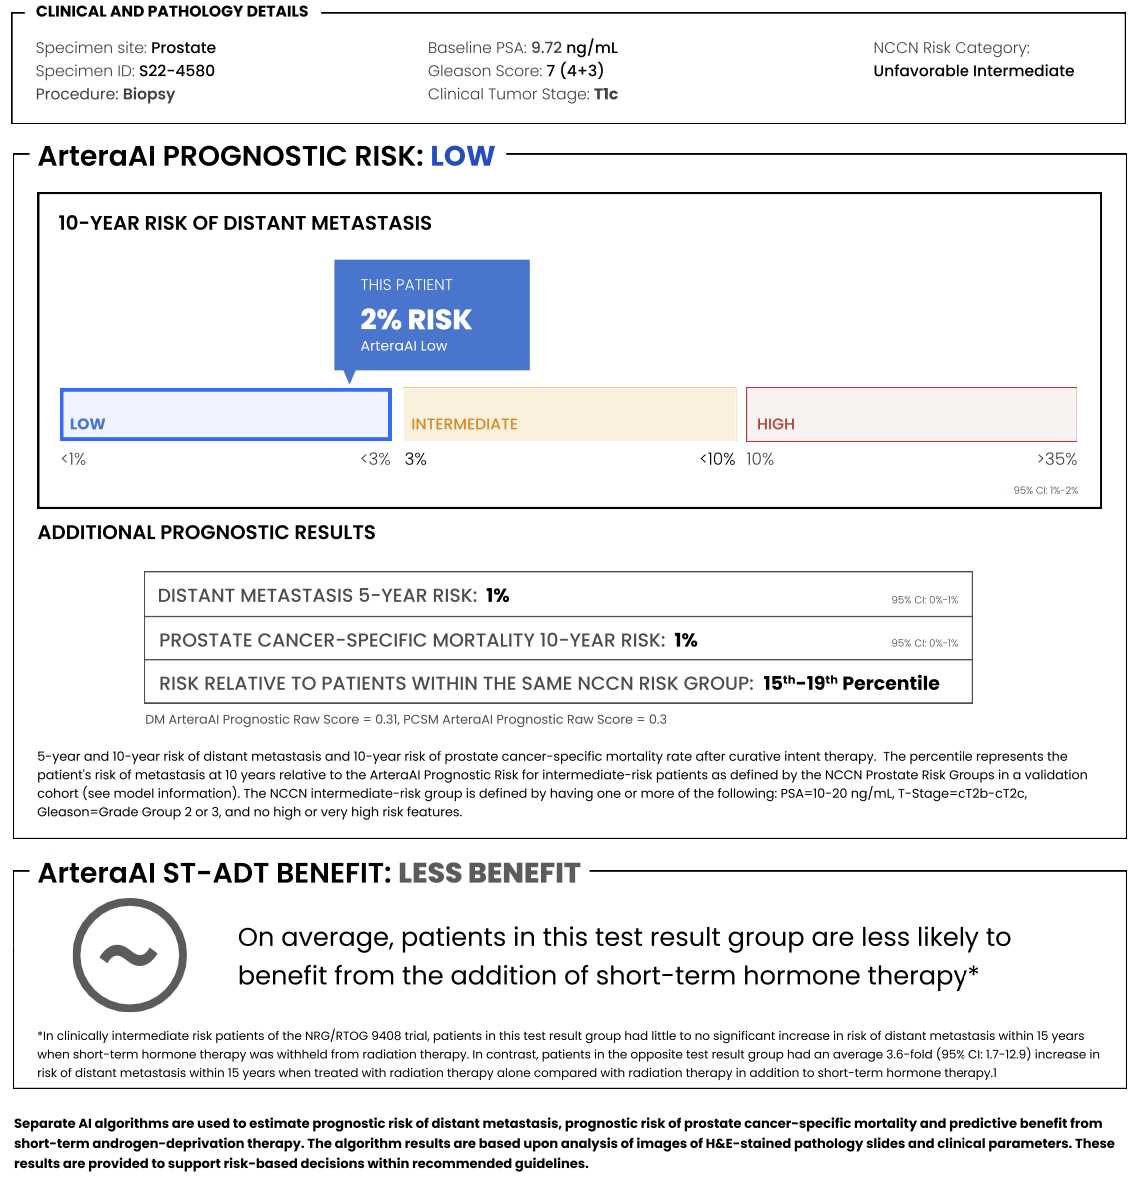


**B)** **Scenario B – initial PSA 12.8, ISUP 2, T2c. Predictive for a High 12% 10-year risk of distant metastasis with short-term ADT to be of ‘more benefit’. Anticipated very high absolute benefit with the addition of ADT.**


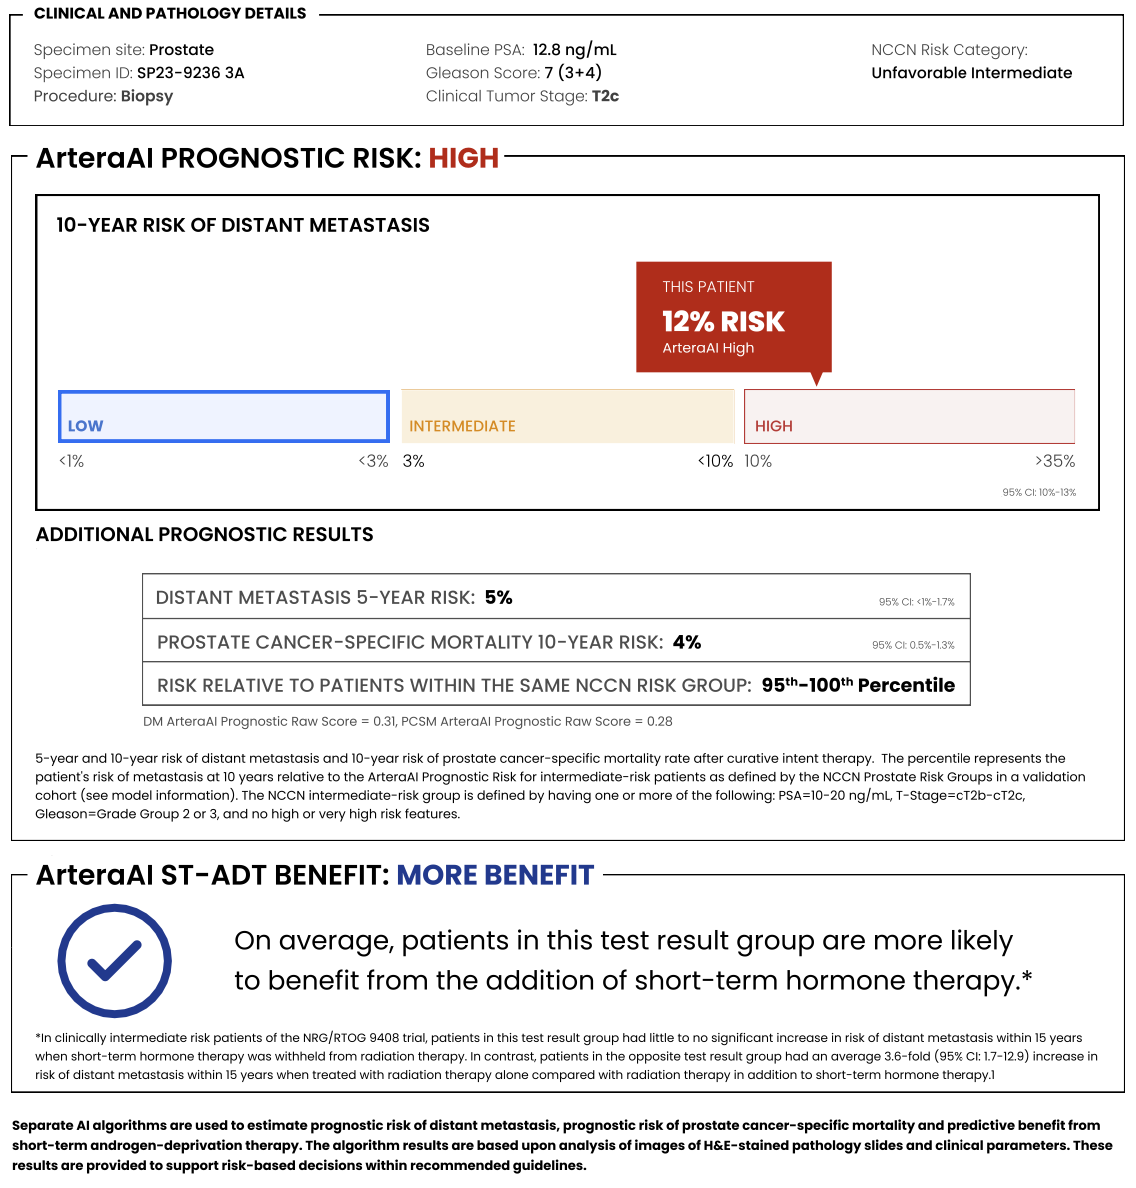


**C) Scenario C – initial PSA 11.42, ISUP 3, T2a. Predictive for a Low 2% 10-year risk of distant metastasis with short-term ADT to be of ‘more benefit’. Anticipated low absolute benefit with the addition of ADT.**


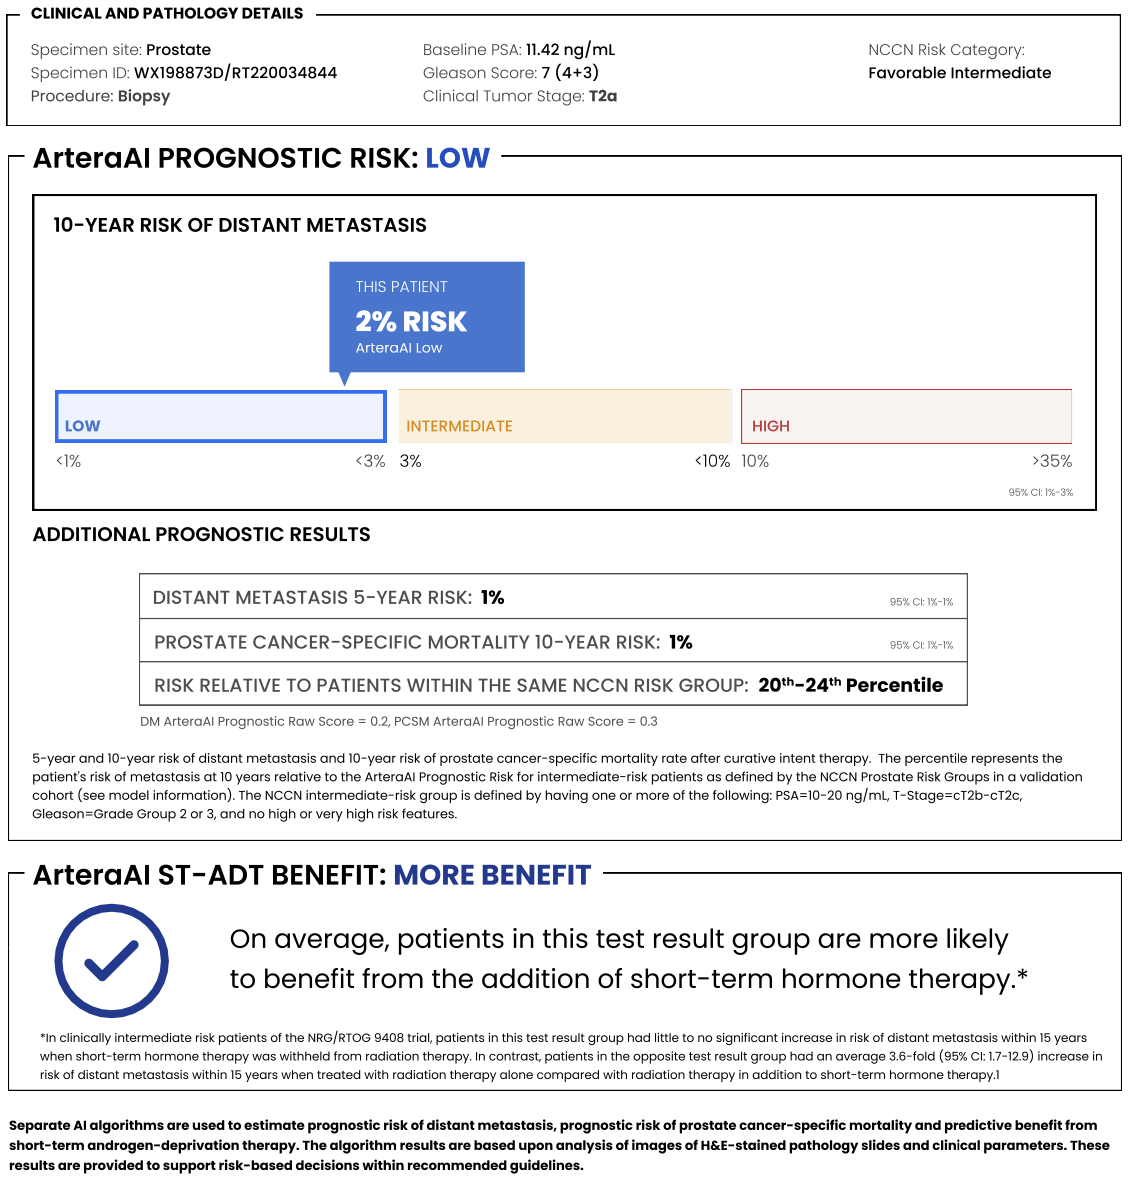


**D) Scenario D – initial PSA 6.46, ISUP 2, T2a. Predictive for a High 11% 10-year risk of distant metastasis with short-term ADT to be of ‘less benefit’. Anticipated low absolute benefit with the addition of ADT.**


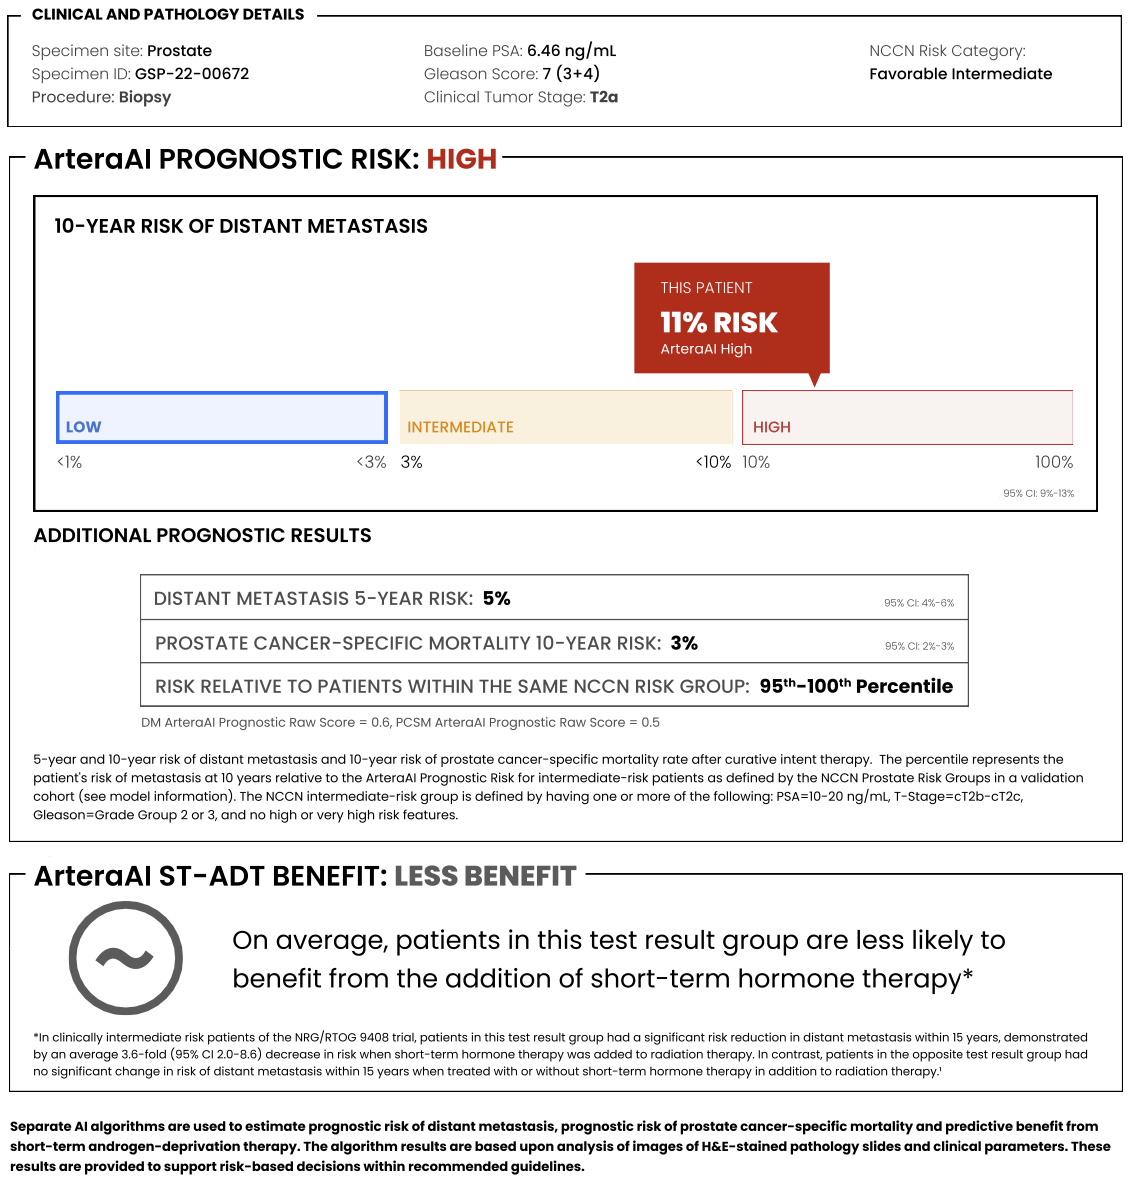


**Supplementary Fig. 2 – Prostate cancer-specific mortality ten-year risk in unfavourable and favourable intermediate-risk prostate cancer patients**

The prostate cancer-specific mortality ten-year risk was similar to the ten-year distant metastases risk. The median ten-year prostate cancer specific mortality was 1.2% (IQR 0.9 – 1.6) and 0.8% (IQR 0.6 – 0.9) in the UIR and FIR subgroups respectively, which was significantly different (p<0.001).

**Supplementary Fig. 3 – Patient and clinician short term-ADT decision choices, pre and post MMAI test results**


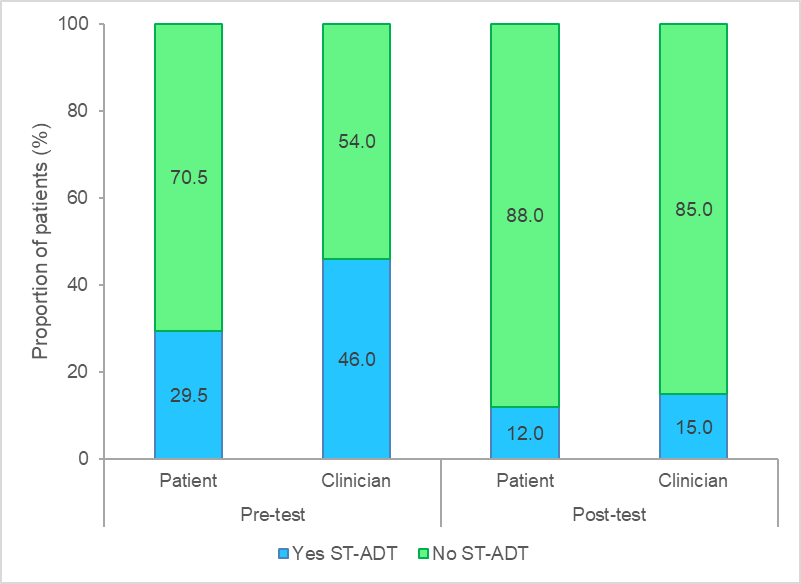

Supplement: Supplementary file 1 [file 5e6931830e22f3f924397a72.docx]
